# Supplementary figures and images for: Label-free detection and enumeration of rare circulating tumor cells by bright-field image cytometry and multi-frame image correlation analysis
Source: Royal Society of Chemistry journal article supplement (doi:10.1039/d2lc00190j), 2022-01-01

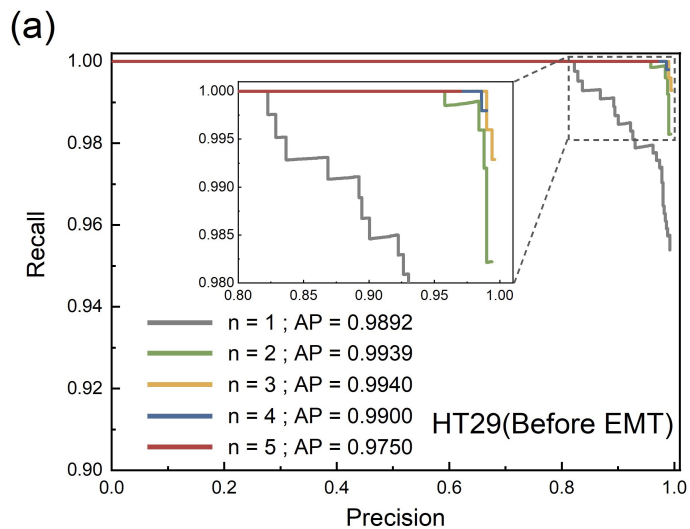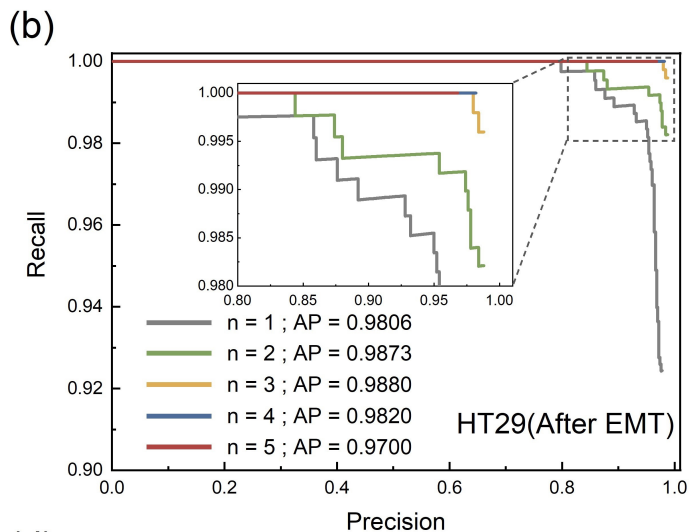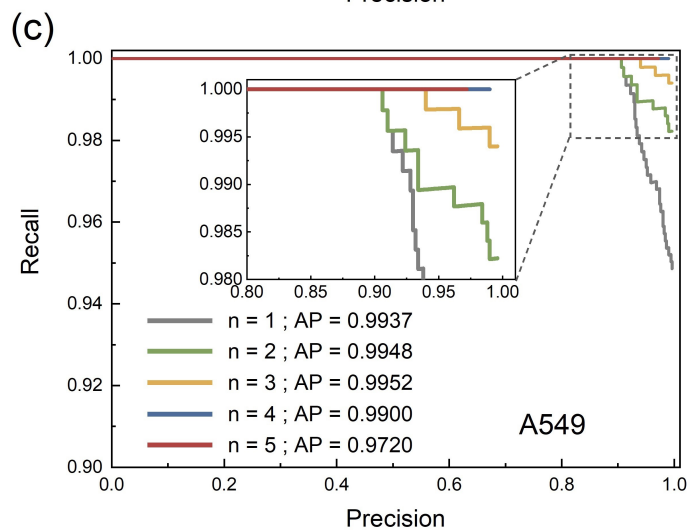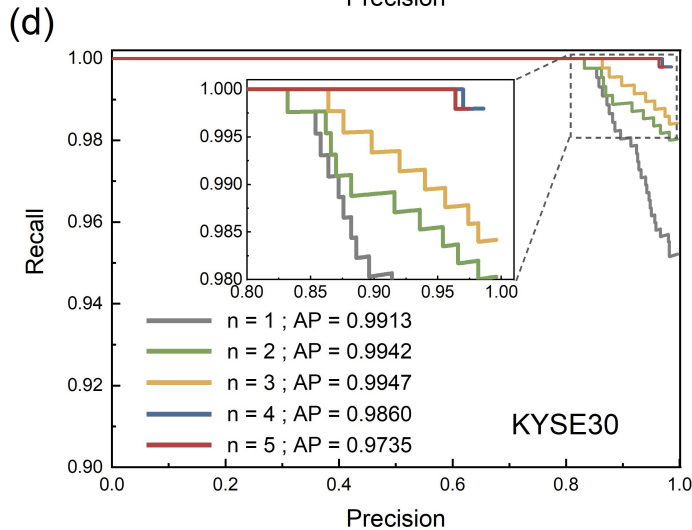

Supplement: d2lc00190j3.pdf [file d2lc00190j3.pdf]

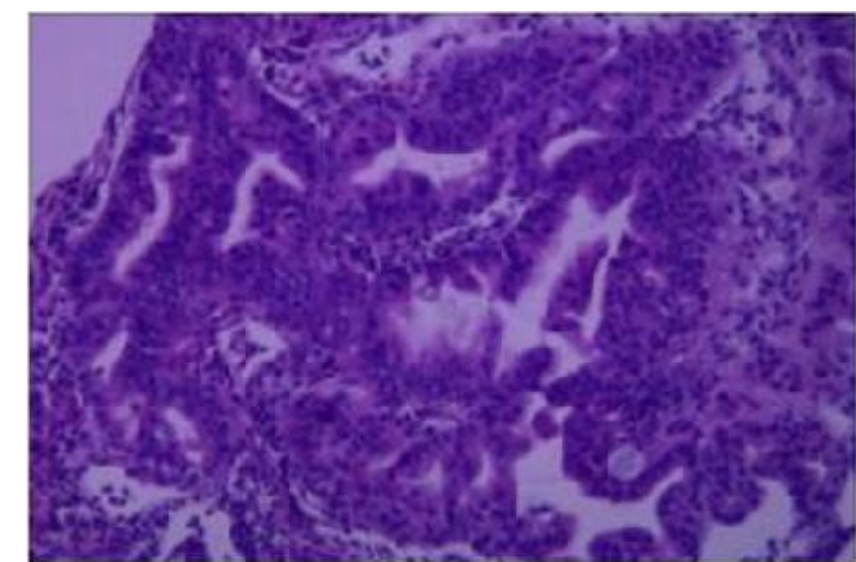

**(a)**

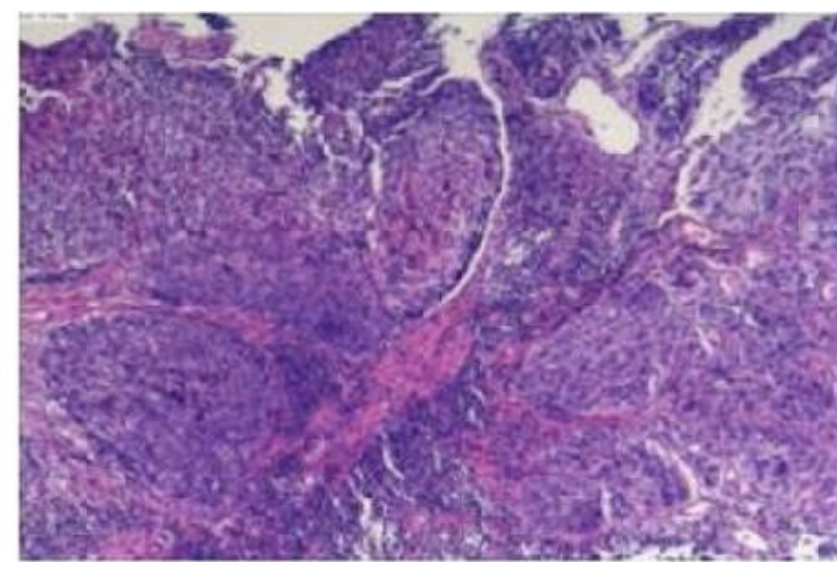

**(b)**

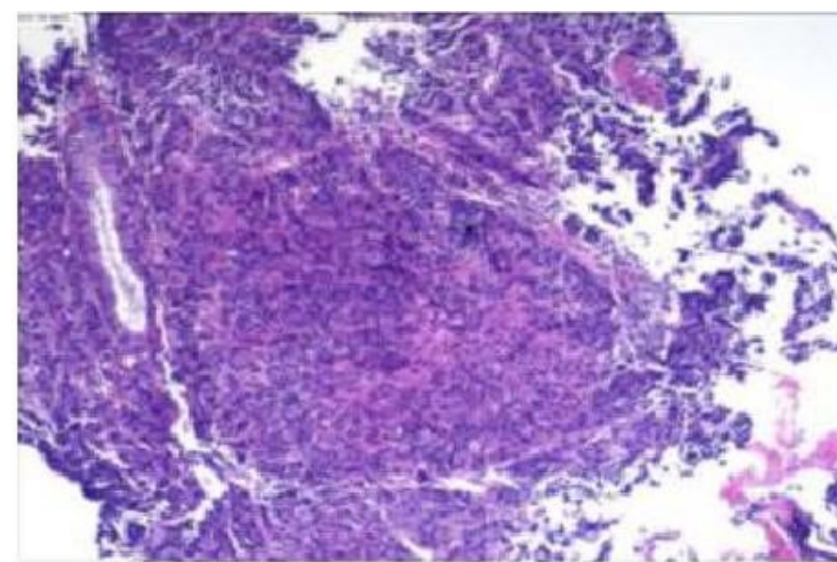

**(c)**

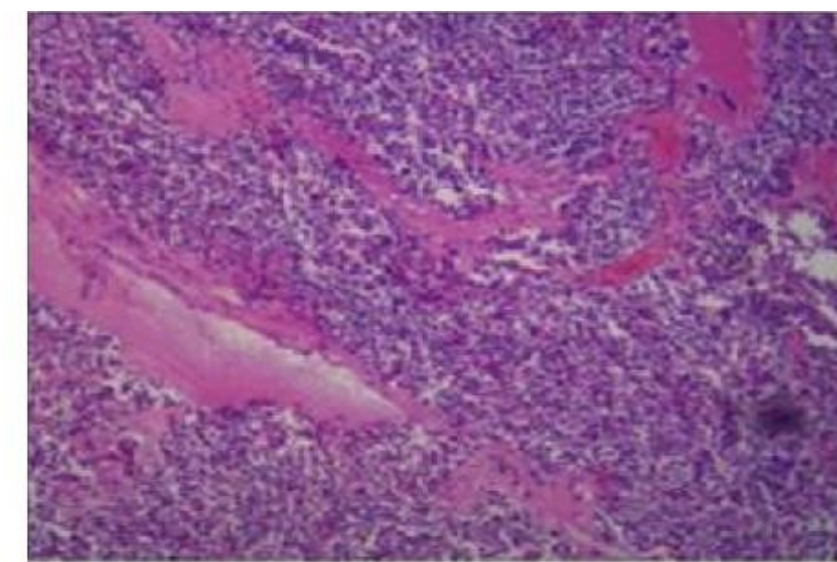

**(d)**

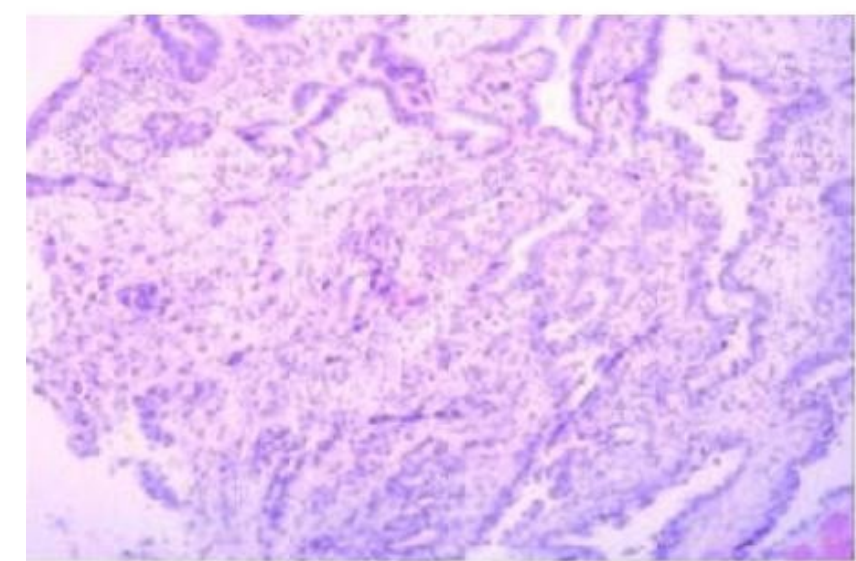

**(e)**

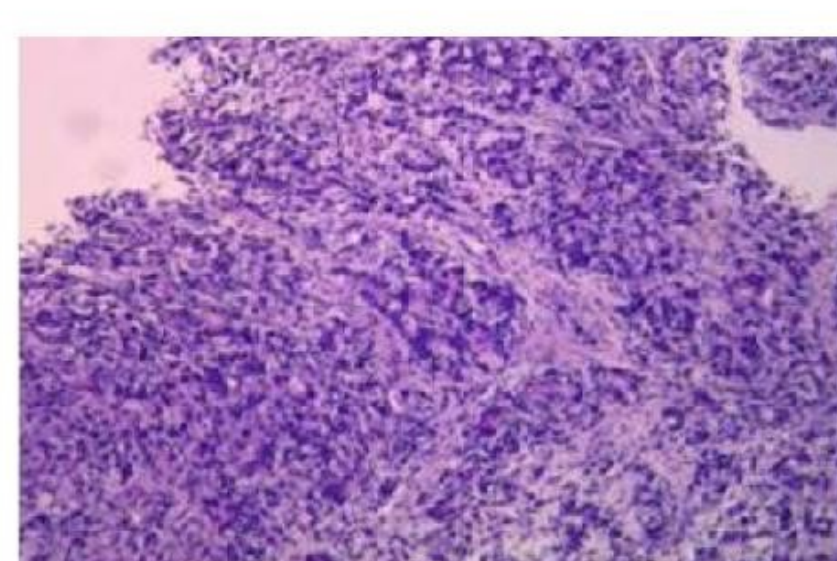

**(f)**

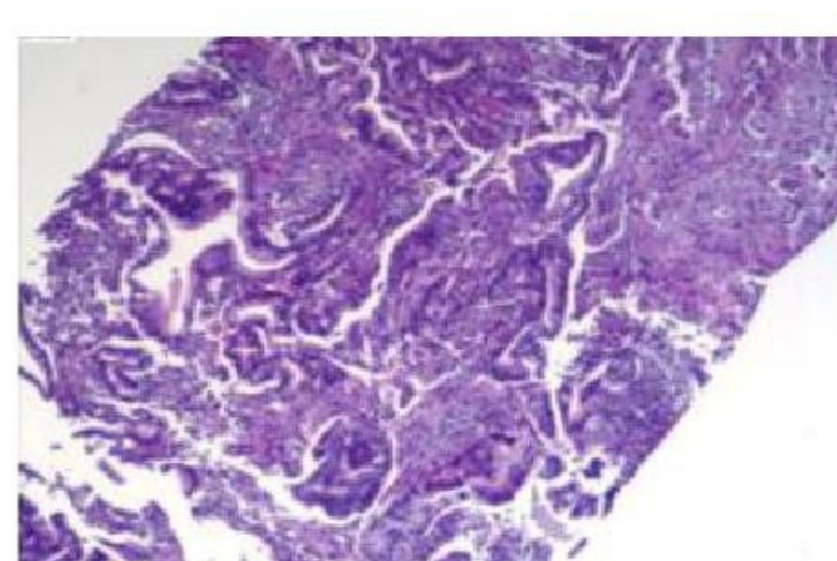

**(g)**

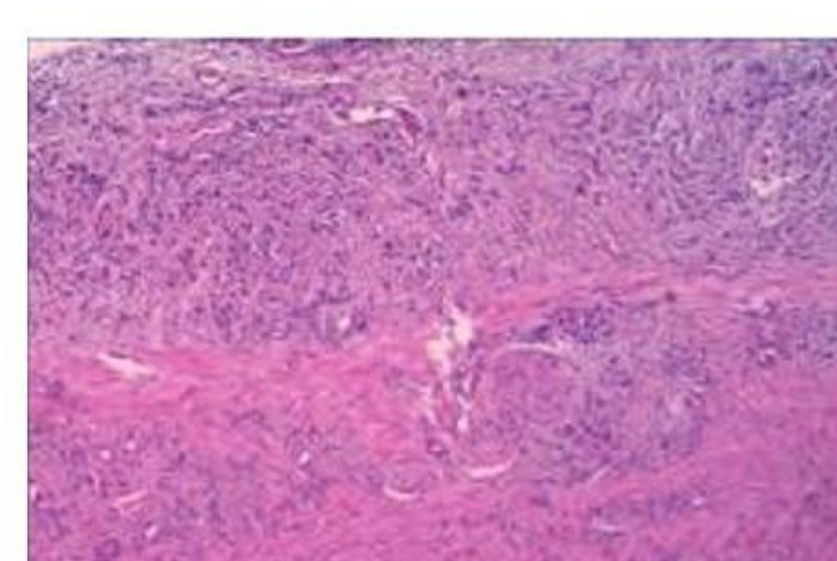

**(h)**

Supplement: d2lc00190j4.pdf [file d2lc00190j4.pdf]
